# Supplementary material
Source: PubMed Central journal article supplement (PMC1959396)

# Supplementary Figure 1

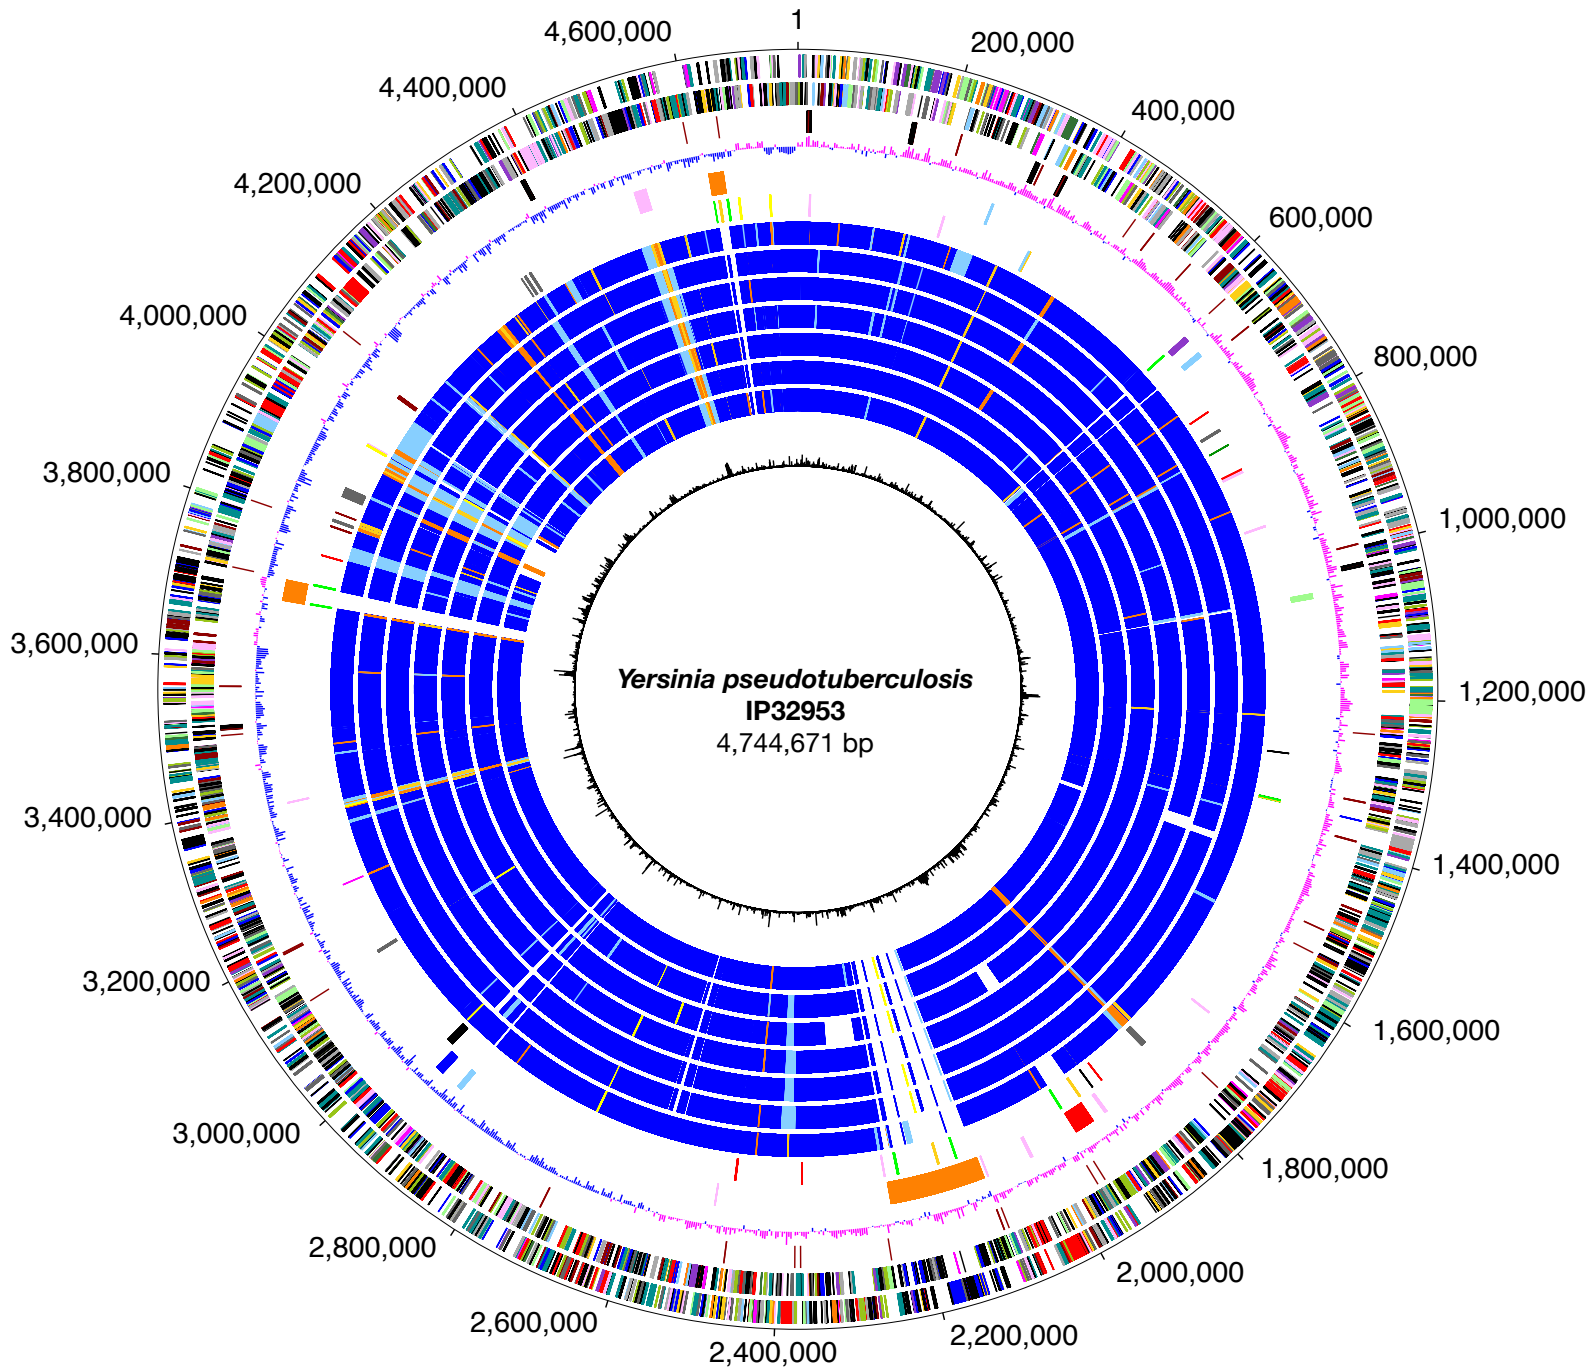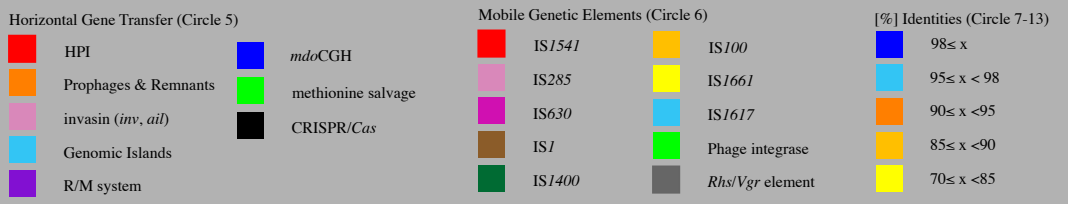

Supplement: pgen.0030142.sg001.pdf [file pgen.0030142.sg001.pdf]
